# Supplementary material for: Variable salinity responses of 12 alfalfa genotypes and comparative expression analyses of salt-response genes
Source: PubMed Central journal article supplement (PMC5320470; doi:10.1038/srep42958), 2017-02-22
Supplement: srep42958-s1.pdf [file srep42958-s1.pdf]

**Variable salinity responses of 12 alfalfa genotypes and comparative expression analyses of salt-response genes**

Devinder Sandhu, Monica V. Cornacchione, Jorge F.S. Ferreira, Donald L. Suarez

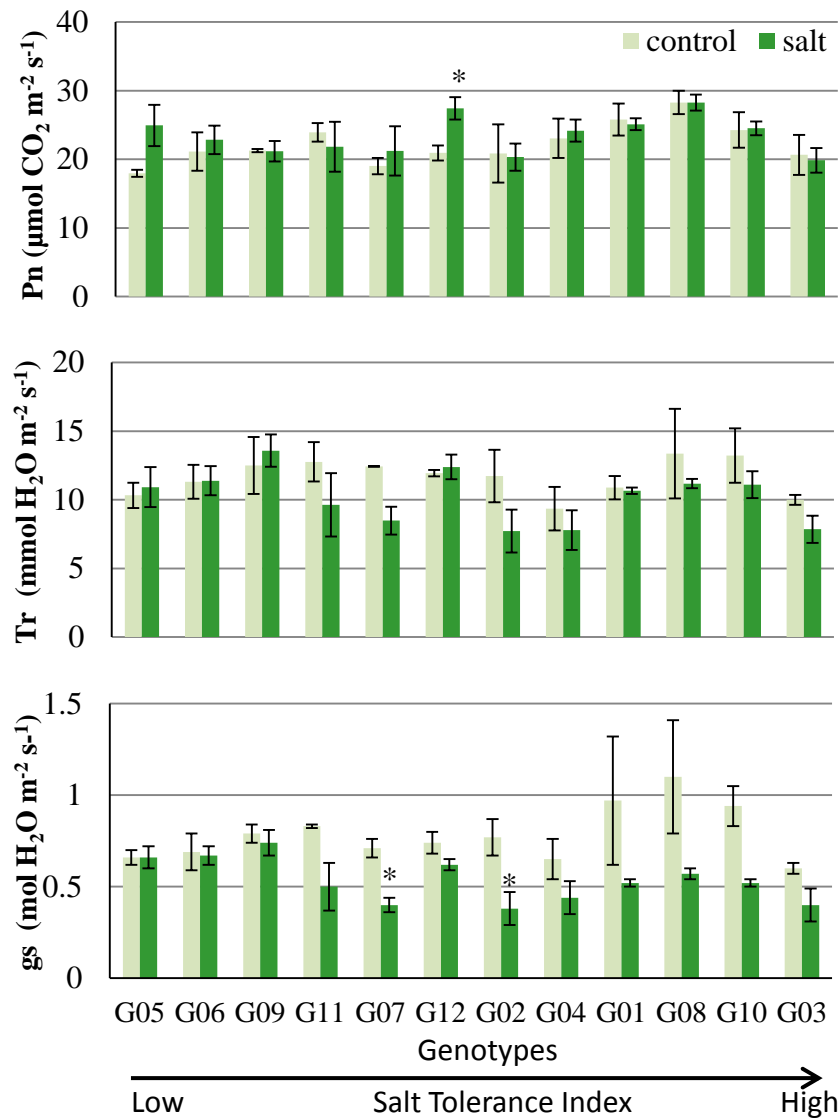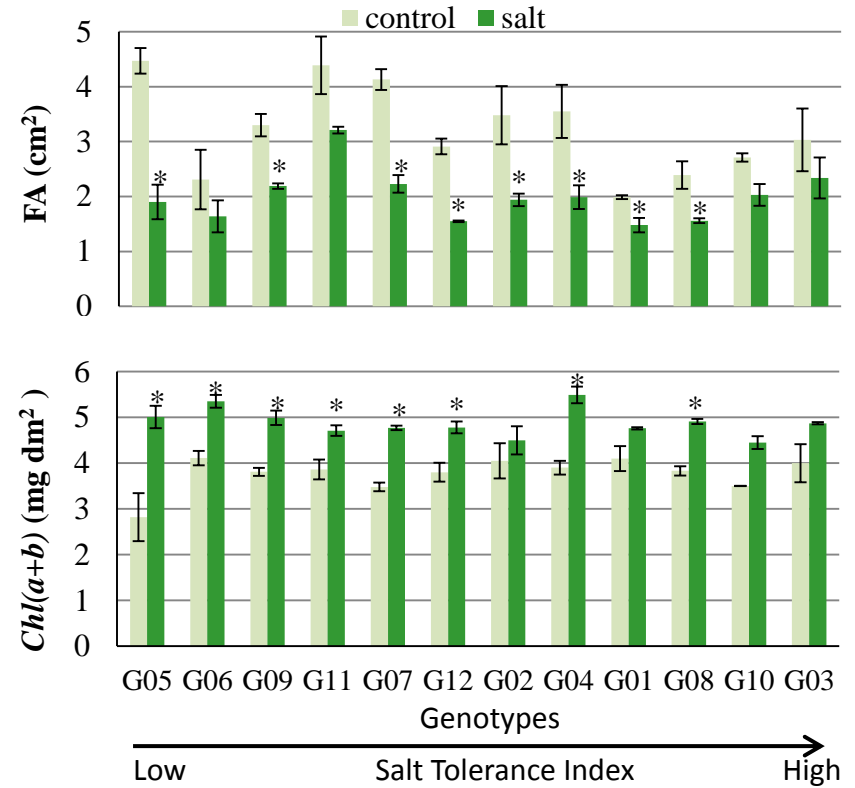

Supplementary Fig. S1. Physiological parameters of 12 alfalfa genotypes in the control and salt treatments. A, Net photosynthesis ( $P_n$ ); B, Transpiration ( $Tr$ ); C, stomatal conductance ( $g_s$ ); D, Foliar area ( $FA$ ); E, Chlorophyll content ( $Chl(a+b)$ ). Genotypes are arranged on x-axis in ascending order based on their ST index. Error bars represent standard error. Asterisks indicate differences (t-test  $P \leq 0.05$ ) between the treatments for a genotype.

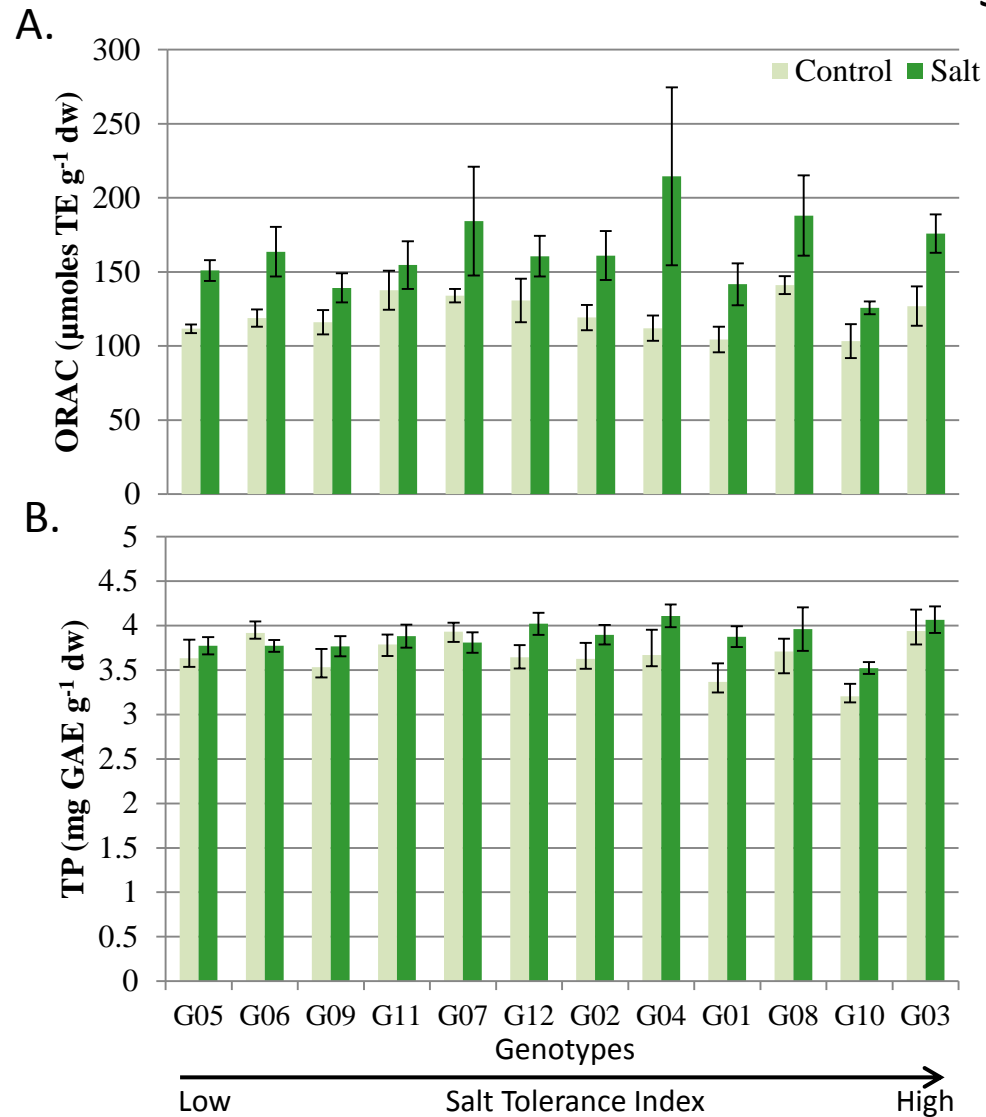

Supplementary Fig. S2. Antioxidant capacity of 12 alfalfa genotypes irrigated with control water ( $\text{EC}_{\text{iw}} = 1.97$ ) and saline water ( $\text{EC}_{\text{iw}} = 16.6 \text{ dS m}^{-1}$ ). A, Hydrophilic oxygen radical absorbance capacity (ORAC); B, total phenolics (TP). ORAC units are micromoles of trolox equivalents per gram of dry weight ( $\mu\text{moles} \cdot \text{TE} \cdot \text{g}^{-1} \text{ dw}$ ). TP units are milligrams of gallic acid equivalents per gram of dry weight ( $\text{mg} \cdot \text{GAE} \cdot \text{g}^{-1} \text{ dw}$ ). Genotypes are arranged on  $x$ -axis in ascending order based on their ST index. Error bars represent standard error.

Supplementary Table S1. Shoot ion concentrations of alfalfa genotypes in the control (C) and salt (S) treatments.

| Genotypes | Mg mean |       | P mean |       | Fe mean |      | Cu mean |      | Mn mean |      | Zn mean |      | K/Na |     |
|-----------|---------|-------|--------|-------|---------|------|---------|------|---------|------|---------|------|------|-----|
|           | C       | S     | C      | S     | C       | S    | C       | S    | C       | S    | C       | S    | C    | S   |
| G01       | 123.2   | 120.5 | 112.3  | 98.5  | 94.0    | 76.5 | 12.0    | 9.4  | 19.1    | 35.0 | 23.4    | 30.9 | 21.4 | 5.1 |
| G02       | 128.5   | 118.0 | 101.7  | 99.8  | 81.3    | 72.3 | 9.0     | 9.7  | 20.3    | 27.6 | 23.3    | 34.0 | 9.7  | 1.4 |
| G03       | 136.0   | 140.8 | 102.7  | 93.4  | 88.4    | 77.5 | 10.8    | 9.2  | 17.7    | 31.1 | 24.9    | 31.0 | 18.8 | 4.7 |
| G04       | 134.0   | 102.6 | 104.9  | 95.3  | 90.6    | 71.8 | 9.5     | 10.4 | 25.5    | 42.8 | 25.6    | 31.5 | 9.5  | 1.5 |
| G05       | 141.5   | 146.8 | 108.6  | 109.9 | 93.5    | 91.0 | 15.7    | 10.6 | 18.7    | 32.7 | 28.8    | 32.1 | 14.1 | 2.5 |
| G06       | 173.3   | 180.0 | 104.4  | 97.0  | 83.5    | 69.7 | 12.3    | 10.6 | 21.3    | 37.5 | 25.9    | 31.4 | 22.0 | 8.0 |
| G07       | 142.3   | 122.9 | 117.1  | 98.4  | 101.4   | 76.9 | 11.6    | 11.7 | 21.0    | 30.5 | 26.2    | 31.8 | 10.7 | 1.8 |
| G08       | 164.9   | 147.3 | 101.5  | 92.4  | 87.0    | 77.6 | 8.8     | 9.7  | 18.6    | 27.3 | 23.6    | 34.0 | 14.1 | 3.2 |
| G09       | 117.5   | 116.3 | 121.3  | 101.2 | 74.9    | 66.0 | 12.6    | 9.0  | 18.2    | 41.0 | 26.2    | 31.3 | 24.3 | 8.2 |
| G10       | 150.0   | 126.2 | 95.3   | 87.9  | 84.4    | 75.5 | 9.5     | 9.5  | 18.8    | 27.2 | 21.7    | 26.4 | 14.4 | 2.9 |
| G11       | 119.4   | 98.9  | 100.5  | 97.7  | 100.1   | 83.3 | 9.3     | 16.1 | 20.0    | 35.6 | 25.5    | 35.2 | 15.8 | 2.8 |
| G12       | 132.3   | 117.2 | 103.4  | 93.9  | 76.8    | 66.6 | 11.4    | 9.1  | 16.4    | 24.0 | 27.4    | 29.3 | 7.1  | 1.5 |
| Average   | 138.6   | 128.1 | 106.1  | 97.1  | 88.0    | 75.4 | 11.0    | 10.4 | 19.6    | 32.7 | 25.2    | 31.6 | 15.1 | 3.6 |
